# Supplementary material for: The DOF Transcription Factor SlDOF10 Regulates Vascular Tissue Formation During Ovary Development in Tomato
Source: Front Plant Sci. 2019 Feb 26;10:216. doi: 10.3389/fpls.2019.00216 (PMC6399211; doi:10.3389/fpls.2019.00216)
Supplement: TABLE S1 — Primers used in this work. [file Table_1.XLSX]

## Sheet: Hoja1
	Supplemental Table S1. Primers used in this work
	Oligo name	Sequence 5' to 3'	Experiment
	SlACT8 qPCR For	CAAGTTATTACCATTGGTGCT	Primers used in qRT-PCR analyses
	SlACT8 qPCR Rev	TGCAGCTTCCATACCAATCAT
	SlDOF10 qPCR For	TCATTTCTGCAAGACTTGTCGAC	Primers used in qRT-PCR analyses
	SlDOF10 qPCR Rev	CGTAACGCGCCTCCTTTAGT
	DOF10 pro-For	GAA GAG TGA TAA GTC CTA GTG	SlDOF10 promotor amplification
	DOF10 pro-Rer	AGC AAA TGA GAT TGC TCT TAG
	SlDOF10-ORF-For	ATG ATT CAA GAG CTG TTT GCA GG	SlDOF10 cDNA amplification
	SlDOF10-ORF-Rev	TTA AAG ATA TGC CCC ATT TGC TG
	SlDOF10-RNAi-For	CAC TTC CGT TTG AGT TTA TTG G	Amplification of a 428 bp fragment of SlDOF10 gene
	SlDOF10-RNAi-Rev	ATA TGC CCC ATT TGC TGT TGG
	2X DOF For	CGTGACATGTAAAGTGAATAACGTGACATGTAAAGTGAATAAA	Transactivation assay
	2X DOF Rev	TTATTCACTTTACATGTCACGTTATTCACTTTACATGTCACGA
